# Supplementary material
Source: MDPI journal article supplement (https://www.mdpi.com/2077-0472/12/5/597)
Supplement: s1 [file s1]

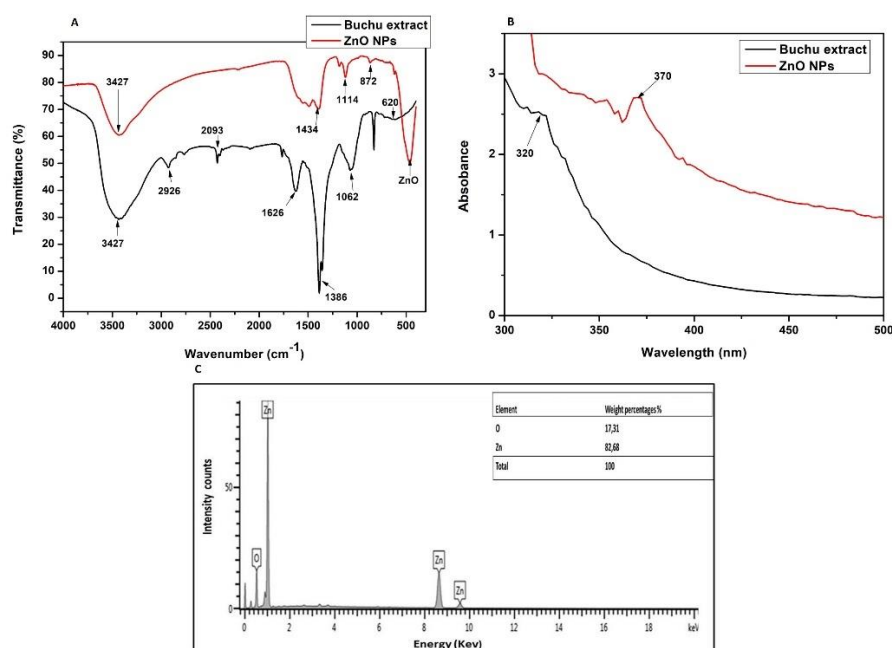

**Figure S1.** Characterization of green-synthesized ZnO NPs using, Ultraviolet-Visible absorption spectra for ZnO NPs and buchu extract at (A) 400 – 4000 nm wavelength, (B) 300 – 500 nm wavelength range, (C) element composition of the ZnO NPs sample.

**Table S1.** Overall element distribution analyzed by SEM-EDX spectroscopy in sorghum shoots.

| Element              | Weight (%) 0 mM | 400 mM | 400 mM + 5 mg/L | 400 mM + 10 Mg/L |
|----------------------|-----------------|--------|-----------------|------------------|
| C                    | 58.01           | 53.32  | 62.41           | 54.04            |
| O                    | 37.78           | 38.37  | 28.2            | 32.82            |
| Na                   | 0.51            | 0.67   | 1.18            | 1.98             |
| Mg                   | 0.15            | -      | -               | 0.37             |
| Al                   | -               | 1.59   | 0.61            | -                |
| Si                   | 1               | -      | 0.31            | 1.11             |
| P                    | 0.15            | 0.26   | 0.44            | 0.61             |
| S                    | -               | 0.19   | 0.24            | 0.19             |
| Cl                   | 2.03            | 5.37   | 5.61            | 6.27             |
| K                    | 0.24            | 0.23   | 0.77            | 2.32             |
| Ca                   | 0.13            | -      | 0.22            | 0.29             |
| Total percentage (%) | 100             | 100    | 100             | 100              |
